# Supplementary material
Source: Elsevier journal article supplement (https://www.sciencedirect.com/science/article/pii/S1699258X12001404)
Supplement: mmc2 [file S1699258X12001404:mmc2.pdf]

**Tabla 2.** Estudios excluidos y motivos de exclusión.

| Estudio              | Razones de exclusión                                            |
|----------------------|-----------------------------------------------------------------|
| Adami, 2004 (32)     | No incluye ONM como medida de resultado                         |
| Aki, 2003 (33)       | No incluye ONM como medida de resultado                         |
| Almazrooa, 2009 (34) | Revisión narrativa                                              |
| Bagger, 2003 (35)    | No incluye resultados de seguridad                              |
| Bell, 2002 (36)      | No incluye resultados de seguridad                              |
| Berenson, 2008 (37)  | Pacientes con gammapatía monoclonal de significado incierto     |
| Bhoopalam, 2009 (38) | Pacientes con cáncer de próstata                                |
| Black, 2003 (39)     | No incluye ONM como medida de resultado                         |
| Bonnick, 2007 (40)   | No incluye ONM como medida de resultado                         |
| Boonen, 2004 (41)    | No incluye ONM como medida de resultado                         |
| Brown, 2001 (42)     | Estudio de seguimiento. No incluye ONM como medida de resultado |
| Campbell, 2004 (43)  | No incluye ONM como medida de resultado                         |
| Chesnut, 1995(44)    | No incluye ONM como medida de resultado                         |
| Choi, 2008 (45)      | No incluye ONM como medida de resultado                         |
| De Nijs, 2006 (46)   | No incluye ONM como medida de resultado                         |
| Delmas, 2009 (47)    | Subestudio del HORIZON                                          |
| Edwards, 2008 (48)   | No incluye ONM como medida de resultado                         |
| Emkey, 2009 (49)     | No incluye ONM como medida de resultado                         |
| Evio, 2006 (50)      | No incluye ONM como medida de resultado                         |
| Fogelman, 2000 (51)  | No incluye ONM como medida de resultado                         |
| Fujii, 2007 (52)     | No incluye pacientes con osteoporosis                           |
| Fujita, 2007 (53)    | No incluye ONM como medida de resultado                         |
| Fukunaga, 2002 (54)  | No incluye ONM como medida de resultado                         |
| Geusens, 1998 (55)   | No incluye ONM como medida de resultado                         |
| Giusti, 2009 (56)    | No incluye ONM como medida de resultado                         |
| Grbic, 2008 (26)     | Análisis exploratorio del estudio HORIZON                       |
| Greespan, 2002 (57)  | No incluye ONM como medida de resultado                         |
| Greespan, 2003 (58)  | No incluye ONM como medida de resultado                         |
| Guañabens, 2000 (59) | No incluye ONM como medida de resultado                         |
| Harris, 1999 (60)    | No incluye ONM como medida de resultado                         |
| Heath, 2000 (61)     | No incluye ONM como medida de resultado                         |
| Ho, 2005 (62)        | No incluye ONM como medida de resultado                         |
| Holder, 2008 (63)    | Artículo de opinión                                             |
| Homik, 1999 (64)     | No incluye ONM como medida de resultado                         |
| Hosking, 2003 (65)   | No incluye ONM como medida de resultado                         |
| Iizuka, 2008 (66)    | No incluye ONM como medida de resultado                         |
| Ilter, 2006 (67)     | No incluye ONM como medida de resultado                         |
| Iwamoto, 2003 (68)   | No incluye ONM como medida de resultado                         |
| Kanaji, 2006 (69)    | No incluye ONM como medida de resultado                         |
| Kishimoto, 2006 (70) | No incluye ONM como medida de resultado                         |
| Kitazaki, 2009 (71)  | No incluye ONM como medida de resultado                         |
| Krueger, 2007 (72)   | RS de ONM en pacientes con cáncer                               |
| Kushida, 2002 (73)   | No incluye ONM como medida de resultado                         |
| Kushida, 2004 (74)   | No incluye ONM como medida de resultado                         |

|                          |                                                                  |
|--------------------------|------------------------------------------------------------------|
| Lam, 2008 (75)           | No incluye ONM como medida de resultado                          |
| Lane, 2005 (76)          | No incluye pacientes con osteoporosis ni ONM                     |
| Lange, 2004 (77)         | No incluye ONM como medida de resultado                          |
| Lee, 2009 (78)           | Revisión narrativa                                               |
| Lau, 2000 (79)           | No incluye ONM como medida de resultado                          |
| Lau, 2001 (80)           | No incluye ONM como medida de resultado                          |
| Leung, 2005 (81)         | No incluye ONM como medida de resultado                          |
| Madrid, 2009 (82)        | RS sobre la influencia de BF sobre los implantes orales          |
| McClung, 2004 (83)       | No incluye pacientes con osteoporosis ni ONM                     |
| McClung, 2007 (84)       | Estudio de preferencias. No incluye ONM como medida de resultado |
| McClung, 2009 (85)       | No incluye ONM como medida de resultado                          |
| Meunier, 1997 (86)       | No incluye ONM como medida de resultado                          |
| Miller, 2005 (87)        | Resultados a 1 año del estudio MOBILE de 2 años de duración      |
| Morabito, 2003 (88)      | No incluye ONM como medida de resultado                          |
| Mortensen, 1998 (89)     | No incluye pacientes con osteoporosis ni ONM                     |
| Nakayama, 2004 (90)      | No incluye pacientes con osteoporosis ni ONM                     |
| Orr-Walker, 1997 (91)    | No incluye datos de seguridad, ni ONM como medida de resultado   |
| Otrock, 2006 (92)        | No incluye ONM como medida de resultado                          |
| Pecherstorfer, 1996 (93) | No incluye ONM como medida de resultado                          |
| Racewicz, 2007 (94)      | No incluye ONM como medida de resultado                          |
| Recker, 2006 (95)        | No incluye ONM como medida de resultado                          |
| Reginster, 2006 (96)     | No incluye ONM como medida de resultado                          |
| Reid, 1994 (97)          | No incluye ONM como medida de resultado                          |
| Reid, 2000 (98)          | No incluye ONM como medida de resultado                          |
| Reid, 2002 (99)          | No incluye ONM como medida de resultado                          |
| Rizzoli, 2008 (100)      | No incluye ONM como medida de resultado                          |
| Rosen, 2005 (101)        | No incluye ONM como medida de resultado                          |
| Ryan, 2000 (102)         | No incluye ONM como medida de resultado                          |
| Sambrook, 2003 (103)     | No incluye ONM como medida de resultado                          |
| Sambrook, 2004 (104)     | No incluye ONM como medida de resultado                          |
| Sato, 2004 (105)         | No incluye pacientes con osteoporosis ni ONM                     |
| Sato, 2005 (106)         | No incluye pacientes con osteoporosis ni ONM                     |
| Schnitzer, 2000 (107)    | No incluye ONM como medida de resultado                          |
| Shimon, 2005 (108)       | No incluye ONM como medida de resultado                          |
| Shiraki, 1998 (109)      | No incluye ONM como medida de resultado                          |
| Smith, 2003 (110)        | No incluye ONM como medida de resultado                          |
| Stakkestad, 2003 (111)   | No incluye ONM como medida de resultado                          |
| Stoch, 2009 (112)        | No incluye ONM como medida de resultado                          |
| Stock, 1997 (113)        | No incluye ONM como medida de resultado                          |
| Storm, 1990 (114)        | No incluye ONM como medida de resultado                          |
| Storm, 1996 (115)        | No incluye ONM como medida de resultado                          |
| Takeda, 2008 (116)       | No incluye ONM como medida de resultado                          |
| Tascioglu, 2005 (117)    | No incluye ONM como medida de resultado                          |
| Thiebaud, 1997 (118)     | No incluye ONM como medida de resultado                          |
| Tonino, 2000 (119)       | No incluye ONM como medida de resultado                          |
| Torregrosa, 2010 (120)   | No incluye ONM como medida de resultado                          |
| Trenque, 2009 (121)      | Estudio retrospectivo de una base de datos de ONM                |

|                         |                                         |
|-------------------------|-----------------------------------------|
| Von Tirpitz, 2003 (122) | No incluye ONM como medida de resultado |
| Yarom, 2007 (123)       | Estudio retrospectivo                   |
| Yen, 2000 (124)         | No incluye ONM como medida de resultado |

**Abreviaturas:** RS=revisión sistemática; ONM=osteonecrosis de mandíbula; OP=osteoporosis; BF=bifosfonados.
